# Supplementary figures and images for: The Mutational Spectrum of Pre- and Post-Neoadjuvant Chemotherapy Triple-Negative Breast Cancers
Source: MDPI journal article supplement (doi:10.3390/genes15010027), 2023-12-23

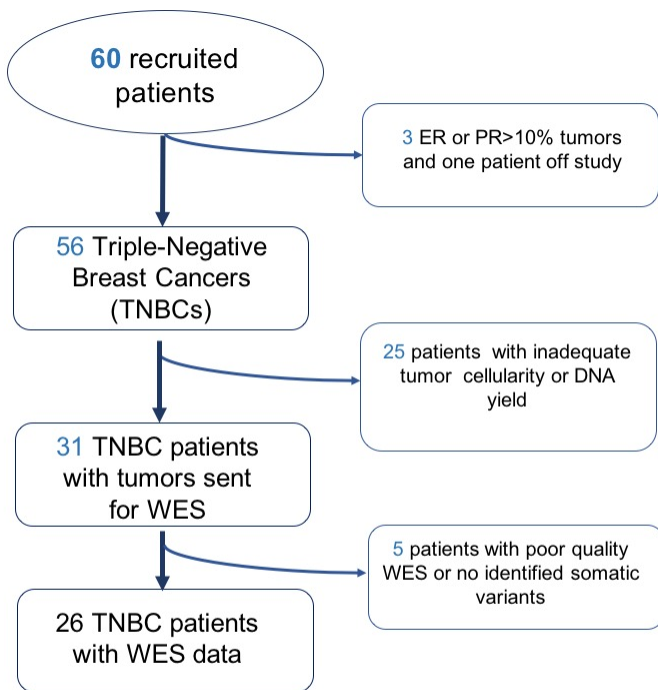

**Supplementary Figure 1. Flow Chart of Q-CROC-03 patient samples included in WES analysis.**

Supplement: s1 [file s1]
